# Supplementary material for: Bioactive compounds, nutritive properties and adaptation of five seaweeds growing in Cox’s Bazar, Bangladesh
Source: Research Square preprint supplement (doi:10.21203/rs.3.rs-3815760/v1), 2024-01-10
Supplement: Supplementary file 1 [file 611c260203d021a092a40272.xlsx]

## Sheet: All raw data
	Na data			Na data
Location		Sample No	Absorbance	Concentration	Conc * dilution factor	Mean	SD	Mean ± SD		Standard's value
St. Martin Island	Species Name	Hm-1	74	35.937	251.559	245.434	13.9133	245.43 ± 13.91		Absorbance	Concentration
	Hypnea musciformis	Hm-2	75	36.462	255.234					100	50
		Hm-3	68	32.787	229.509					45	20
		Hs-1	34	14.937	104.559	110.684	13.9133	110.68 ± 13.91		26	10
	Hypnea spinella	Hs-2	33	14.412	100.884					13	5
		Hs-3	40	18.087	126.609
Rezu Khal Estuary		UlR-1	31	13.362	93.534	93.534	3.675	93.53 ± 3.68
	Ulva lactuca	UlR-2	32	13.887	97.209
		UlR-3	30	12.837	89.859
		GtR-1	18	6.537	45.759	43.309	4.24352	43.31 ± 4.24
	Gracilaria tenuistipitata	GtR-2	16	5.487	38.409
		GtR-3	18	6.537	45.759
North Nuniachara		EiN-1	23	9.162	65.279	67.813	2.19451	67.81 ± 2.19
	Enteromorpha intestinalis	EiN-2	24	9.687	69.08
		EiN-3	24	9.687	69.08
		UlN-1	23	9.162	64.134	60.459	3.675	60.46 ± 3.67
	Ulva lactuca	UlN-2	21	8.112	56.784
		UlN-3	22	8.637	60.459
		GtN-1	18	6.537	45.759	42.084	3.675	42.08 ± 3.67
	Gracilaria tenuistipitata	GtN-2	17	6.012	42.084
		GtN-3	16	5.487	38.409
				K Data
Location		Sample No	Absorbance	Concentration	Conc * dilution factor	Mean	SD	Mean ± SD		Standard's value
St. Martin Island	Species Name	Hm-1	42	17.9712	71.8848	71.1567	1.26116	71.16 ± 1.26		Absorbance	Concentration
	Hypnea musciformis	Hm-2	42	17.9712	71.8848					100	50
		Hm-3	41	17.4251	69.7004					48	20
		Hs-1	21	6.5031	71.5341	69.5317	3.4682	69.53 ± 3.47		25	10
	Hypnea spinella	Hs-2	21	6.5031	71.5341					19	5
		Hs-3	20	5.957	65.527
Rezu Khal Estuary		UlR-1	59	27.2549	109.02	111.932	3.33673	111.93 ± 3.33
	Ulva lactuca	UlR-2	60	27.801	111.204
		UlR-3	62	28.8932	115.573
		GtR-1	90	44.184	441.84	445.481	11.368	445.48 ± 11.37
	Gracilaria tenuistipitata	GtR-2	89	43.6379	436.379
		GtR-3	93	45.8223	458.223
North Nuniachara		EiN-1	65	30.5315	152.658	155.388	4.72936	155.38 ± 4.73
	Enteromorpha intestinalis	EiN-2	68	32.1698	160.849
		EiN-3	65	30.5315	152.658
		UlN-1	40	16.879	83.805	88.035	3.66329	88.03 ± 3.67
	Ulva lactuca	UlN-2	42	17.9712	90.15
		UlN-3	42	17.9712	90.15
		GtN-1	51	22.8861	141.058	139.507	3.65459	139.5 ± 3.65
	Gracilaria tenuistipitata	GtN-2	54	24.5244	142.046
		GtN-3	50	22.34	135.28
			Pb Data
									Standard value
									12	0.2001
Location		Sample No	Absorbance	Mean Absorbance	Concentration	Mean	SD		20	0.6747
St. Martin Island	Species Name	Hm-1	0.2096	0.202	8.0253	7.76887	0.222079
	Hypnea musciformis	Hm-2	0.1945		7.6413
		Hm-3	0.194		7.64
		Hs-1	0.61	0.607	20.5108	20.3825	0.111083
	Hypnea spinella	Hs-2	0.604		20.3188
		Hs-3	0.603		20.318
Rezu Khal Estuary		UlR-1	0.075	0.077	3.9285	4.015	0.0749116
	Ulva lactuca	UlR-2	0.079		4.0585
		UlR-3	0.078		4.058
		GtR-1	0.062	0.063	3.6625	3.63107	0.0272243
	Gracilaria tenuistipitata	GtR-2	0.065		3.6157
		GtR-3	0.064		3.615
North Nuniachara		EiN-1	0.227	0.231	8.6539	8.79817	0.124939
	Enteromorpha intestinalis	EiN-2	0.234		8.8706
		EiN-3	0.235		8.87
		UlN-1	0.186	0.189	7.3874	7.49123	0.089948
	Ulva lactuca	UlN-2	0.187		7.5453
		UlN-3	0.191		7.541
		GtN-1	0.319	0.316	11.4966	11.3684	0.111025
	Gracilaria tenuistipitata	GtN-2	0.312		11.3046
		GtN-3	0.313		11.304
				Cr Data
Location		Sample No	Absorbance	mean absorbance	Concentration(ppb)	mean	stdev			standard value
St. Martin Island	Species Name	Hm-1	0.4479	0.439933	4.159	4.1686	0.141844			2	0.2132
	Hypnea musciformis	Hm-2	0.4313		4.0318					4	0.443
		Hm-3	0.4406		4.315					12	0.8283
		Hs-1	1.13542	1.09061	11.8183	11.0821	0.718735			16	1.4907
	Hypnea spinella	Hs-2	1.1329		10.3822
		Hs-3	1.0035		11.0459
Rezu Khal Estuary		UlR-1	0.952	0.8006	9.8107	8.1304	1.59345
	Ulva lactuca	UlR-2	0.7834		7.9395
		UlR-3	0.6664		6.641
		GtR-1	0.7058	0.660867	7.0783	6.5796	0.559158
	Gracilaria tenuistipitata	GtR-2	0.6704		6.6854
		GtR-3	0.6064		5.9751
North Nuniachara		EiN-1	0.3014	0.737433	2.5901	7.4293	4.19132
	Enteromorpha intestinalis	EiN-2	0.9499		9.7873
		EiN-3	0.961		9.9105
		UlN-1	1.3692	1.35427	14.4408	14.2751	0.485596
	Ulva lactuca	UlN-2	1.3886		14.6561
		UlN-3	1.305		13.7283
		GtN-1	1.2677	1.22577	13.3144	12.849	0.405486
	Gracilaria tenuistipitata	GtN-2	1.2008		12.5719
		GtN-3	1.2088		12.6607
				Cd data						Standard value
Location		Sample No	Absorbance	mean ab	Concentration(ppb)	mean	stdev			4	1.7081
St. Martin Island	Species Name	Hm-1	1.8414	1.83933	5.0406	5.02447	0.0253066			8	2.2205
	Hypnea musciformis	Hm-2	1.8356		4.9953
		Hm-3	1.841		5.0375
		Hs-1	1.8311	1.86997	4.9602	5.25867	0.306278
	Hypnea spinella	Hs-2	1.9095		5.5722
		Hs-3	1.8693		5.2436
Rezu Khal Estuary		UlR-1	0.5731	0.572767	-4.8603	-4.86287	0.202962
	Ulva lactuca	UlR-2	0.5986		-4.6612
		UlR-3	0.5466		-5.0671
		GtR-1	0.84	0.817033	-2.7767	-2.95603	0.155347
	Gracilaria tenuistipitata	GtR-2	0.806		-3.0422
		GtR-3	0.8051		-3.0492			(-) indicated below detection level
North Nuniachara		EiN-1	0.5173	0.520967	-5.2959	-5.26727	0.0893595
	Enteromorpha intestinalis	EiN-2	0.5338		-5.1671
		EiN-3	0.5118		-5.3388
		UlN-1	0.3004	0.308167	-5.0742	-4.81737	0.27841
	Ulva lactuca	UlN-2	0.3114		-4.8564
		UlN-3	0.3127		-4.5215
		GtN-1	1.0768	1.05077	-0.9282	-1.13133	0.31169
	Gracilaria tenuistipitata	GtN-2	1.0048		-1.4902
		GtN-3	1.0707		-0.9756
			Ni data
Location		Sample No	Absorbance	mean ab	Concentration(ppb)	mean	stdev			Standard value
St. Martin Island	Species Name	Hm-1	0.433	0.455867	-0.0017	-0.0009	ND	(-) indicated below detection level		4	0.1034
	Hypnea musciformis	Hm-2	0.4275		-0.0017					8	0.2617
		Hm-3	0.5071		0.0007					12	0.3767
		Hs-1	0.0151	0.0130667	0.9484	0.971933	0.0659292			16	0.5002
	Hypnea spinella	Hs-2	0.0058		0.921
		Hs-3	0.0183		1.0464
Rezu Khal Estuary		UlR-1	0.0416	0.0291667	1.7604	1.71273	0.0443821
	Ulva lactuca	UlR-2	0.0398		1.7052
		UlR-3	0.0061		1.6726
		GtR-1	0.0323	0.0182333	1.4757	1.3778	0.172869
	Gracilaria tenuistipitata	GtR-2	-0.0002		1.4795
		GtR-3	0.0226		1.1782
North Nuniachara		EiN-1	0.2789	0.1454	9.0317	5.60767	2.96534
	Enteromorpha intestinalis	EiN-2	0.1108		3.8808
		EiN-3	0.0465		3.9105
		UlN-1	0.0163	0.0165333	0.9851	0.9923	0.00774855
	Ulva lactuca	UlN-2	0.0168		1.0005
		UlN-3	0.0165		0.9913
		GtN-1	0.1129	0.109967	3.9452	3.85527	0.0826303
	Gracilaria tenuistipitata	GtN-2	0.1094		3.8379
		GtN-3	0.1076		3.7827
			Bioactive Compounds Data
Location		Sample No	Absorbance at 663 nm	Absorbance at 645nm	Absorbance at 480nm	Weight of the sample(g)	Vol of extraction(L)	Chl-a	Mean value	SD Value	Mean±SD	Chl-b	Mean value	SD Value	Mean value	Tot Chl	Mean value	SD value	Mean ± SD	Carotenoid	Mean value	SD Value	Mean ± SD
St. Martin Island	Species Name	Hm-1	0.7	0.383	0.386	0.5	0.0105	0.165054				0.115242	0.110986			0.280363	0.246342			0.032424	0.0406843
	Hypnea musciformis	Hm-2	0.751	0.527	0.618	0.5	0.0095	0.154281	0.135	0.042535	0.135 ± 0.043	0.162376		0.0536453	0.111 ± 0.054	0.3167		0.092202	0.246 ± 0.092	0.046968		0.00747074	0.041 ± 0.007
		Hm-3	0.421	0.219	0.586	0.5	0.0091	0.0865881				0.0553391				0.141964				0.0426608
		Hs-1	0.978	0.63	0.801	0.5	0.0056	0.12013	0.106612			0.11021	0.0769387			0.230379	0.183593	0.0449352		0.0358848	0.0441589
	Hypnea spinella	Hs-2	0.614	0.312	0.803	0.5	0.008	0.111336		0.00220303	0.107± 0.002	0.0682422		0.0298876	0.077 ± 0.030	0.179627			0.184 ± 0.045	0.051392		0.00780584	0.049 ± 0.013
		Hs-3	0.389	0.194	0.565	0.5	0.01	0.0883688				0.0523638				0.140772				0.0452
Rezu Khal Estuary		UlR-1	0.839	0.435	0.502	0.5	0.0085	0.161248	0.150566			0.102452	0.10107			0.263768	0.251699			0.034136	0.0335424
	Ulva lactuca	UlR-2	0.87	0.453	0.562	0.5	0.0075	0.147456		0.0077692	0.151± 0.008	0.094401		0.00609696	0.101±0.006	0.24192		0.0111028	0.252 ± 0.011	0.03372		0.000699518	0.034 ± 0.001
		UlR-3	0.842	0.478	0.539	0.5	0.0076	0.142995				0.106358				0.249408				0.0327712
		GtR-1	0.656	0.316	0.516	0.5	0.0068	0.101744	0.112127			0.0565727	0.0603107			0.158363	0.172489			0.0280704	0.0385715
	Gracilaria tenuistipitata	GtR-2	0.663	0.306	0.535	0.5	0.0071	0.107877		0.0130388	0.112±0.013	0.0553506		0.0075574	0.060 ± 0.008	0.163278		0.016624	0.172 ± 0.017	0.030388		0.0162227	0.039 ± 0.016
		GtR-3	0.653	0.311	0.842	0.5	0.0085	0.126761				0.0690086				0.195827				0.057256
North Nuniachara		EiN-1	1.727	0.945	0.633	0.5	0.0068	0.263716	0.251402			0.184156	0.214842			0.447978	0.447589			0.0344352	0.0284291
	Enteromorpha intestinalis	EiN-2	1.672	0.908	0.589	0.5	0.0065	0.244294		0.0107063	0.251±0.011	0.16837		0.0672855	0.215 ± 0.067	0.412764		0.0346325	0.448 ± 0.035	0.030628		0.00735636	0.028 ± 0.007
		EiN-3	1.409	0.932	0.316	0.5	0.008	0.246196				0.292				0.482025				0.020224
		UlN-1	1.68	0.523	0.418	0.5	0.008	0.318866	0.320984			0.317	0.317			0.384611	0.404576			0.026752	0.026056
	Ulva lactuca	UlN-2	1.539	0.593	0.347	0.5	0.009	0.323102		0.00258698	0.321±0.003	0.318		0.001	0.317 ± 0.001	0.437785		0.0289554	0.405 ± 0.029	0.024984		0.000769194	0.026 ± 0.003
		UlN-3	1.682	0.543	0.413	0.5	0.008	0.318412				0.316				0.391332				0.026432
		GtN-1	1.275	0.68	0.87	0.5	0.0076	0.218322	0.21701			0.146	0.153667			0.364215	0.370518			0.052896	0.0565213
	Gracilaria tenuistipitata	GtN-2	1.303	0.731	0.968	0.5	0.007	0.204144		0.0122629	0.217±0.012	0.149		0.0107858	0.154 ± 0.011	0.353028		0.0174333	0.371 ± 0.017	0.054208		0.0051847	0.057 ± 0.005
		GtN-3	1.361	0.761	1.041	0.5	0.0075	0.228564				0.166				0.394311				0.06246
			Protein data
Location		Sample No	Abs	unknown conc ( µg/ml)	conc*10	conc (mg/ml)	mg/15ml	mg/g	% of dry weight(g)	Mean percentage
St. Martin Island	Species Name	Hm-1	0.098	285.2	2852	2.852	42.78	85.56	8.556	9.276
	Hypnea musciformis	Hm-2	0.102	293.2	2932	2.932	43.98	87.96	8.796
		Hm-3	0.13	349.2	3492	3.492	52.38	104.76	10.476
		Hs-1	0.0926	274.4	2744	2.744	41.16	82.32	8.232	8.504
	Hypnea spinella	Hs-2	0.0925	274.2	2742	2.742	41.13	82.26	8.226
		Hs-3	0.1063	301.8	3018	3.018	45.27	90.54	9.054
Rezu Khal Estuary		UlR-1	0.0821	253.4	2534	2.534	38.01	76.02	7.602	8.622
	Ulva lactuca	UlR-2	0.0742	237.6	2376	2.376	35.64	71.28	7.128
		UlR-3	0.141	371.2	3712	3.712	55.68	111.36	11.136
		GtR-1	0.167	423.2	4232	4.232	63.48	126.96	12.696	11.996
	Gracilaria tenuistipitata	GtR-2	0.148	385.2	3852	3.852	57.78	115.56	11.556
		GtR-3	0.151	391.2	3912	3.912	58.68	117.36	11.736
North Nuniachara		EiN-1	0.0322	153.6	1536	1.536	23.04	46.08	4.608	4.96
	Enteromorpha intestinalis	EiN-2	0.0325	154.2	1542	1.542	23.13	46.26	4.626
		EiN-3	0.0495	188.2	1882	1.882	28.23	56.46	5.646
		UlN-1	0.0821	253.4	2534	2.534	38.01	76.02	7.602	8.202
	Ulva lactuca	UlN-2	0.0742	237.6	2376	2.376	35.64	71.28	7.128
		UlN-3	0.12	329.2	3292	3.292	49.38	98.76	9.876
		GtN-1	0.154	397.2	3972	3.972	59.58	119.16	11.916	10.964
	Gracilaria tenuistipitata	GtN-2	0.1681	425.4	4254	4.254	63.81	127.62	12.762
		GtN-3	0.0923	273.8	2738	2.738	41.07	82.14	8.214
			Phenol Data
Location	Species Name	Sample No	Sample solution(µg/ml)	volume (ml)	Weight of dry extract/ml	Absorbance at 760nm	GAE Concentration (µg/ml)	GAE Concentration (mg/ml)	Total phenol (mg/g)	Mean value	SD Value	Mean ± SD
St. Martin Island		Hm-1	1000	1	0.000101	0.107	18.9744	0.0189744	18.7865	20.479	2.1139	20.48 ± 2.11
	Hypnea musciformis	Hm-2	1000	1	0.000101	0.123	23.0769	0.0230769	22.8484
		Hm-3	1000	1	0.000101	0.111	20	0.02	19.802						Standard value
		Hs-1	1000	1	0.000103	0.092	15.1282	0.0151282	14.6876	11.2024	3.26484	11.20 ± 3.26			Gallic acid conc(µg/ml)	OD values
	Hypnea spinella	Hs-2	1000	1	0.000103	0.076	11.0256	0.0110256	10.7045						500	1.98
		Hs-3	1000	1	0.000103	0.066	8.46154	0.00846154	8.21509						250	1.07
Rezu Khal Estuary		UlR-1	1000	1	0.00014	0.14	27.4359	0.0274359	19.5971	20.2076	2.79767	20.21 ± 2.80			125	0.52
	Ulva lactuca	UlR-2	1000	1	0.00014	0.16	32.5641	0.0325641	23.2601						62.5	0.266
		UlR-3	1000	1	0.00014	0.13	24.8718	0.0248718	17.7656						31.25	0.156
		GtR-1	1000	1	0.00011	0.37	86.4103	0.0864103	78.5548	73.1158	5.86623	73.12 ± 5.87			15.625	0.084
	Gracilaria tenuistipitata	GtR-2	1000	1	0.00011	0.35	81.2821	0.0812821	73.8928
		GtR-3	1000	1	0.00011	0.32	73.5897	0.0735897	66.8998
North Nuniachara		EiN-1	1000	1	0.000107	0.36	83.8462	0.0838462	78.3609	81.3164	3.76109	81.32 ± 3.76
	Enteromorpha intestinalis	EiN-2	1000	1	0.000107	0.39	91.5385	0.0915385	85.55
		EiN-3	1000	1	0.000107	0.367	85.641	0.085641	80.0383
		UlN-1	1000	1	0.000105	0.308	70.5128	0.0705128	67.1551	73.8299	6.4809	73.83 ± 6.48
	Ulva lactuca	UlN-2	1000	1	0.000105	0.361	84.1026	0.0841026	80.0977
		UlN-3	1000	1	0.000105	0.337	77.9487	0.0779487	74.2369
		GtN-1	1000	1	0.000105	0.39	91.5385	0.0915385	87.1795	81.4815	5.08343	81.48 ± 5.08
	Gracilaria tenuistipitata	GtN-2	1000	1	0.000105	0.36	83.8462	0.0838462	79.8535
		GtN-3	1000	1	0.000105	0.35	81.2821	0.0812821	77.4115
				Flavonoid
Location	Species Name	Sample No	Sample solution(µg/ml)	volume (ml)	Weight of dry extract/ml	Absorbance at 420nm	Quercetin conc C (µg/ml)	Quercetin conc C (mg/ml)	Total flavonoid (mg/g)	Mean value	SD Value	Mean ± SD
St. Martin Island		Hm-1	1000	1	0.000101	0.113	17.3235	0.0173235	17.152	19.1581	1.83234	19.16 ± 1.83
	Hypnea musciformis	Hm-2	1000	1	0.000101	0.138	19.7745	0.0197745	19.5787
		Hm-3	1000	1	0.000101	0.15	20.951	0.020951	20.7435
		Hs-1	1000	1	0.000103	0.097	15.7549	0.0157549	15.296	16.343	0.907995	16.34 ± 0.91
	Hypnea spinella	Hs-2	1000	1	0.000103	0.114	17.4216	0.0174216	16.9141
		Hs-3	1000	1	0.000103	0.113	17.3235	0.0173235	16.819
Rezu Khal Estuary		UlR-1	1000	1	0.00014	0.36	41.5392	0.0415392	29.6709	31.3282	1.75815	31.33 ± 1.76
	Ulva lactuca	UlR-2	1000	1	0.00014	0.381	43.598	0.043598	31.1415
		UlR-3	1000	1	0.00014	0.41	46.4412	0.0464412	33.1723						Standard value
		GtR-1	1000	1	0.00011	0.25	30.7549	0.0307549	27.959	25.8794	2.24297	25.88 ± 2.24			Quercetin conc.(µg/ml)	Quercetin
	Gracilaria tenuistipitata	GtR-2	1000	1	0.00011	0.23	28.7941	0.0287941	26.1765						100	0.995
		GtR-3	1000	1	0.00011	0.2	25.8529	0.0258529	23.5027						50	0.344
North Nuniachara		EiN-1	1000	1	0.000107	0.318	37.4216	0.0374216	34.9734	36.9892	1.93067	36.99 ± 1.93			25	0.196
	Enteromorpha intestinalis	EiN-2	1000	1	0.000107	0.342	39.7745	0.0397745	37.1724						12.5	0.116
		EiN-3	1000	1	0.000107	0.36	41.5392	0.0415392	38.8217
		UlN-1	1000	1	0.000105	0.237	29.4804	0.0294804	28.0766	27.6408	1.54085	27.64 ± 1.54
	Ulva lactuca	UlN-2	1000	1	0.000105	0.246	30.3627	0.0303627	28.9169
		UlN-3	1000	1	0.000105	0.214	27.2255	0.0272255	25.929
		GtN-1	1000	1	0.000105	0.49	54.2843	0.0542843	51.6993	51.4815	1.27455	51.48 ± 1.27
	Gracilaria tenuistipitata	GtN-2	1000	1	0.000105	0.473	52.6176	0.0526176	50.112
		GtN-3	1000	1	0.000105	0.5	55.2647	0.0552647	52.6331

## Sheet: sheet2
Location	Species Name	Triplicate Data	Absorbance	Concentration	Conc * dilution factor	Mean	SD	Mean ± SD		Standard's value
St. Martin Island	Hypnea musciformis	Hm-1	42	17.9712	71.8848	71.1567	1.26116	71.16 ± 1.26		Absorbance	Concentration
		Hm-2	42	17.9712	71.8848					100	50
		Hm-3	41	17.4251	69.7004					48	20
	Hypnea spinella	Hs-1	21	6.5031	71.5341	69.5317	3.4682	69.53 ± 3.47		25	10
		Hs-2	21	6.5031	71.5341					19	5
		Hs-3	20	5.957	65.527
Rezu Khal Estuary	Ulva lactuca	UlR-1	59	27.2549	109.02	111.932	3.33673	111.93 ± 3.33
		UlR-2	60	27.801	111.204
		UlR-3	62	28.8932	115.573
	Gracilaria tenuistipitata	GtR-1	90	44.184	441.84	445.481	11.368	445.48 ± 11.37
		GtR-2	89	43.6379	436.379
		GtR-3	93	45.8223	458.223
North Nuniachara	Enteromorpha intestinalis	EiN-1	65	30.5315	152.658	155.388	4.72936	155.38 ± 4.73
		EiN-2	68	32.1698	160.849
		EiN-3	65	30.5315	152.658
	Ulva lactuca	UlN-1	40	16.879	83.805	88.035	3.66329	88.03 ± 3.67
		UlN-2	42	17.9712	90.15
		UlN-3	42	17.9712	90.15
	Gracilaria tenuistipitata	GtN-1	51	22.8861	141.058	139.507	3.65459	139.5 ± 3.65
		GtN-2	54	24.5244	142.046
		GtN-3	50	22.34	135.28
